# Supplementary material
Source: PubMed Central journal article supplement (PMC1064144)
Supplement: nar_33_5_e47__1.pdf [file nar_33_5_e47__1.pdf]

## A microarray configuration to quantify expression levels and relative abundance of splice variants

Pascale Fehlbaum, Caroline Guihal, Laurent Bracco, Olivier Cochet.

Supplementary material

Table S1: List of genes and identified splice events for which probes were designed. The LF/SF column indicates the long and short form for each transcript.

| Gene    | ACC#      | Isoform                          | LF/SF |
|---------|-----------|----------------------------------|-------|
| HSPC111 | NM_016391 | Wild type                        | LF    |
|         |           | Alternative acceptor site exon 4 | SF    |
| APEX    | NM_001641 | Wild type                        | LF    |
|         |           | Alternative donor site exon 1    | SF    |
| BIN1    | NM_004305 | Wild type                        | LF    |
|         |           | Skipping exon 12                 | SF    |
|         |           | Skipping exon 12 + 13            | SF    |
|         |           | Skipping exon 12 + 13 + 14       | SF    |
|         |           | Skipping exon 13                 | SF    |
| MYBL2   | NM_002466 | Wild type                        | LF    |
|         |           | Skipping exon 8                  | SF    |
| FKBP1A  | NM_00801  | Wild type                        | SF    |
|         |           | intron 4 retention               | LF    |
| DUSP3   | NM_004090 | Wild type                        | SF    |
|         |           | intron retention 3' UTR          | LF    |
| PIIB    | NM_00942  | Wild type                        | SF    |
|         |           | intron 4 retention               | LF    |
| NUDC    | NM_006600 | Wild type                        | FL    |
|         |           | Skipping exon 3 +4               | SF    |
|         |           | Skipping exon 5 +6               | SF    |
|         |           | Skipping exon 3+4+5+6            | SF    |
| APP     | NM_000484 | Wild type                        | LF    |
|         |           | Skipping of exon 7 & 8           | SF    |
| GSTZ1   | NM_001513 | Wild type                        | LF    |
|         |           | Skipping exon 5                  | SF    |
| ROBO1   | NM_002941 | Wild type                        | LF    |
|         |           | Skipping exon 24                 | SF    |
| EWSR1   | NM_005243 | Wild type                        | LF    |
|         |           | Skipping exon 8+9                | SF    |
|         |           | Skipping exon 8                  | SF    |
| PRKDC   | NM_006904 | Wild type                        | LF    |
|         |           | Skipping of exon 80              | SF    |
| CDC37   | NM_007065 | Wild type                        | SF    |
|         |           | intron 3 retention               | LF    |
| MGC8721 | NM_016127 | Wild type                        | LF    |
|         |           | Skipping exon 2                  | SF    |
| MCL1    | NM_021960 | Wild type                        | LF    |
|         |           | Skipping exon 2                  | SF    |
| hnRNPAB | NM_031266 | Wild type                        | LF    |
|         |           | Skipping of exon 7               | SF    |
| hnRNPD  | NM_031370 | Wild type                        | LF    |
|         |           | Skippng of exon2                 | SF    |
